# Supplementary material for: Importance of experimental information (metadata) for archived sequence data: case of specific gene bias due to lag time between sample harvest and RNA protection in RNA sequencing
Source: PeerJ journal article supplement (doi:10.7717/peerj.11875), 2021-08-25

**Atf4**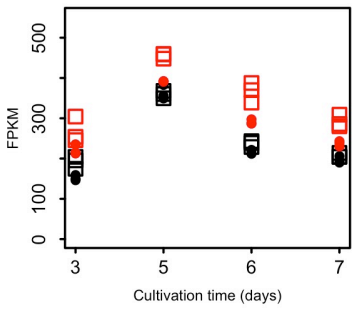**Btg2**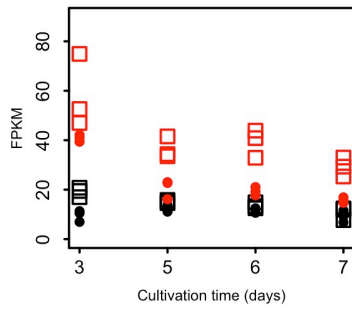**Chub2**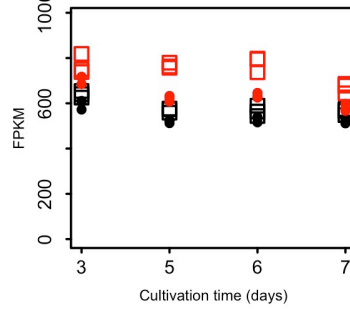**Cyr61**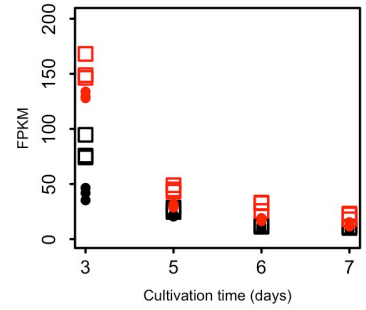**Ddx5**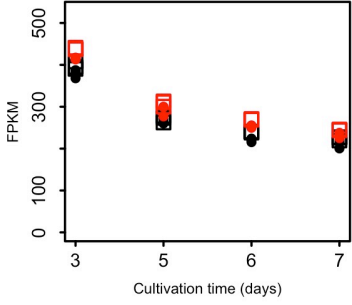**Dusp5**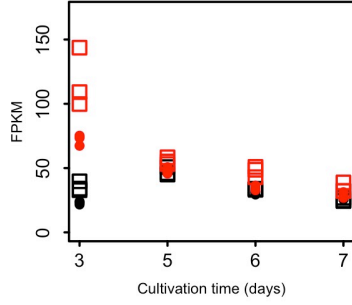**Egr1**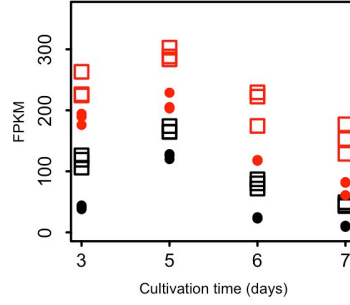**Egr2**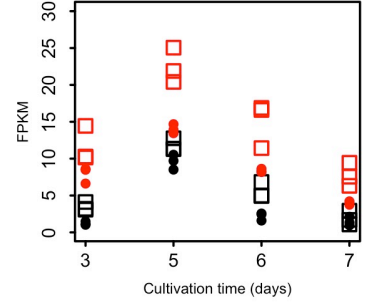**Fos**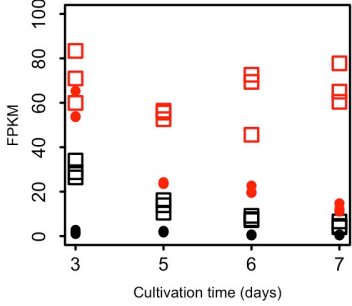**Fosb**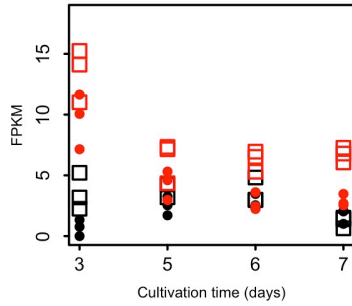**H3f3b**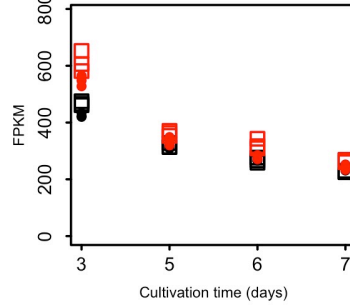**Ier3**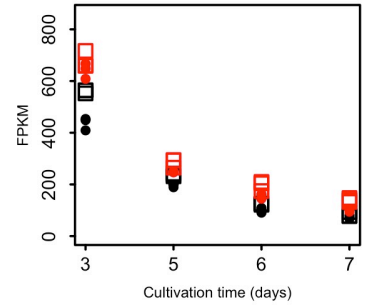**Ier5**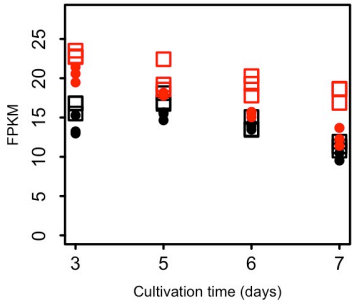**Jun**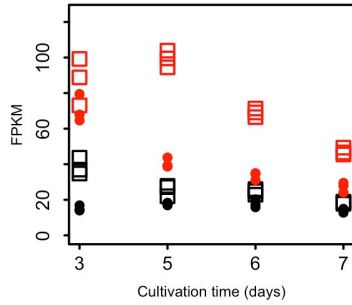**Junb**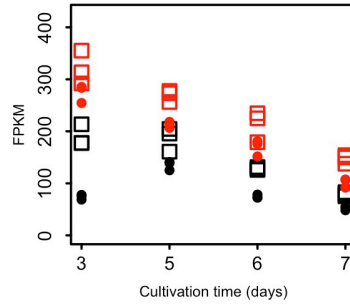**Klf6**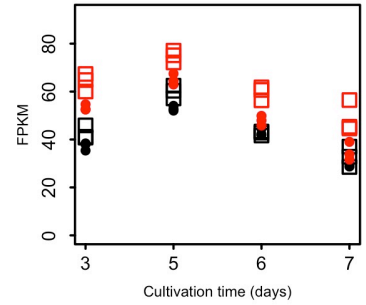**LOC103159497**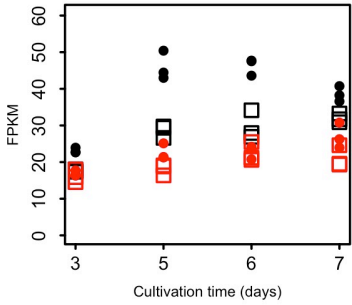**Pik2**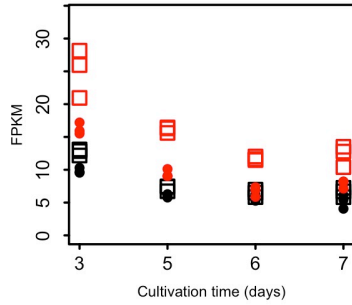**Ppp1r15a**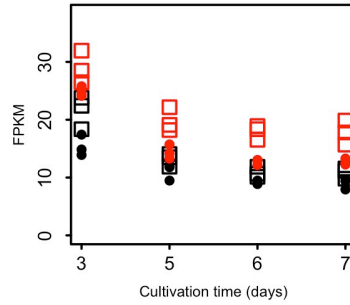**Sgk1**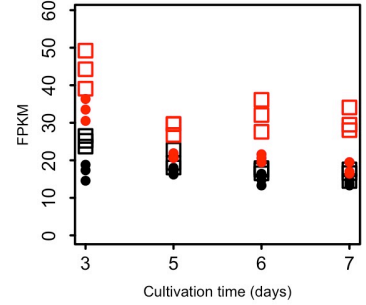**Srsf5**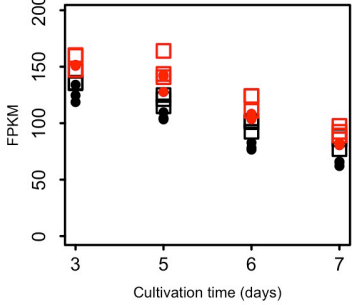**Vegfa**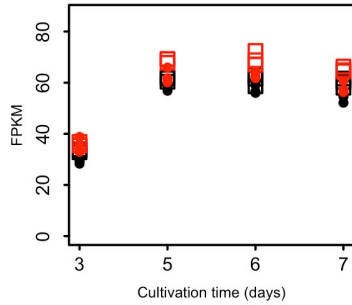**Zfp36**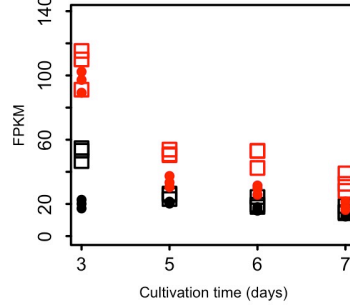

Supplement: Supplemental_Figure_S1.pdf [file Supplemental_Figure_S1.pdf]
