# Supplementary material for: Importance of experimental information (metadata) for archived sequence data: case of specific gene bias due to lag time between sample harvest and RNA protection in RNA sequencing
Source: PeerJ. 2021 Aug 25;9:e11875. doi: 10.7717/peerj.11875 (PMC8401820; doi:10.7717/peerj.11875)
Supplement: Supplemental Information 2 — 249 genes with GO terms included “apoptotic” or “apoptosis”. [file peerj-09-11875-s002.xlsx]

## Sheet: Sheet1
Biological Process	GO:0001781	neutrophil apoptotic process
Biological Process	GO:0001783	B cell apoptotic process
Biological Process	GO:0001844	protein insertion into mitochondrial membrane involved in apoptotic signaling pathway
Biological Process	GO:0002902	regulation of B cell apoptotic process
Biological Process	GO:0002903	negative regulation of B cell apoptotic process
Biological Process	GO:0002904	positive regulation of B cell apoptotic process
Biological Process	GO:0002906	negative regulation of mature B cell apoptotic process
Biological Process	GO:0003277	apoptotic process involved in endocardial cushion morphogenesis
Biological Process	GO:0003278	apoptotic process involved in heart morphogenesis
Biological Process	GO:0006309	apoptotic DNA fragmentation
Biological Process	GO:0006915	apoptotic process
Biological Process	GO:0006919	activation of cysteine-type endopeptidase activity involved in apoptotic process
Biological Process	GO:0006921	cellular component disassembly involved in execution phase of apoptosis
Biological Process	GO:0006925	inflammatory cell apoptotic process
Biological Process	GO:0008625	extrinsic apoptotic signaling pathway via death domain receptors
Biological Process	GO:0008626	granzyme-mediated apoptotic signaling pathway
Biological Process	GO:0008627	intrinsic apoptotic signaling pathway in response to osmotic stress
Biological Process	GO:0008628	hormone-mediated apoptotic signaling pathway
Biological Process	GO:0008630	intrinsic apoptotic signaling pathway in response to DNA damage
Biological Process	GO:0008631	intrinsic apoptotic signaling pathway in response to oxidative stress
Biological Process	GO:0008635	activation of cysteine-type endopeptidase activity involved in apoptotic process by cytochrome c
Biological Process	GO:0008637	apoptotic mitochondrial changes
Biological Process	GO:0010656	negative regulation of muscle cell apoptotic process
Biological Process	GO:0010657	muscle cell apoptotic process
Biological Process	GO:0010659	cardiac muscle cell apoptotic process
Biological Process	GO:0010660	regulation of muscle cell apoptotic process
Biological Process	GO:0010661	positive regulation of muscle cell apoptotic process
Biological Process	GO:0010663	positive regulation of striated muscle cell apoptotic process
Biological Process	GO:0010664	negative regulation of striated muscle cell apoptotic process
Biological Process	GO:0010665	regulation of cardiac muscle cell apoptotic process
Biological Process	GO:0010666	positive regulation of cardiac muscle cell apoptotic process
Biological Process	GO:0010667	negative regulation of cardiac muscle cell apoptotic process
Biological Process	GO:0019050	suppression by virus of host apoptotic process
Biological Process	GO:0030262	apoptotic nuclear changes
Biological Process	GO:0030263	apoptotic chromosome condensation
Biological Process	GO:0030264	nuclear fragmentation involved in apoptotic nuclear change
Biological Process	GO:0033025	regulation of mast cell apoptotic process
Biological Process	GO:0033026	negative regulation of mast cell apoptotic process
Biological Process	GO:0033028	myeloid cell apoptotic process
Biological Process	GO:0033029	regulation of neutrophil apoptotic process
Biological Process	GO:0033030	negative regulation of neutrophil apoptotic process
Biological Process	GO:0033031	positive regulation of neutrophil apoptotic process
Biological Process	GO:0033032	regulation of myeloid cell apoptotic process
Biological Process	GO:0033033	negative regulation of myeloid cell apoptotic process
Biological Process	GO:0033034	positive regulation of myeloid cell apoptotic process
Biological Process	GO:0033668	negative regulation by symbiont of host apoptotic process
Biological Process	GO:0034349	glial cell apoptotic process
Biological Process	GO:0034350	regulation of glial cell apoptotic process
Biological Process	GO:0034351	negative regulation of glial cell apoptotic process
Biological Process	GO:0034352	positive regulation of glial cell apoptotic process
Biological Process	GO:0034391	regulation of smooth muscle cell apoptotic process
Biological Process	GO:0034392	negative regulation of smooth muscle cell apoptotic process
Biological Process	GO:0034393	positive regulation of smooth muscle cell apoptotic process
Biological Process	GO:0035602	fibroblast growth factor receptor signaling pathway involved in negative regulation of apoptotic process in bone marrow cell
Biological Process	GO:0036462	TRAIL-activated apoptotic signaling pathway
Biological Process	GO:0036481	intrinsic apoptotic signaling pathway in response to hydrogen peroxide
Biological Process	GO:0042771	intrinsic apoptotic signaling pathway in response to DNA damage by p53 class mediator
Biological Process	GO:0042981	regulation of apoptotic process
Biological Process	GO:0043065	positive regulation of apoptotic process
Biological Process	GO:0043066	negative regulation of apoptotic process
Biological Process	GO:0043154	negative regulation of cysteine-type endopeptidase activity involved in apoptotic process
Biological Process	GO:0043277	apoptotic cell clearance
Biological Process	GO:0043280	positive regulation of cysteine-type endopeptidase activity involved in apoptotic process
Biological Process	GO:0043281	regulation of cysteine-type endopeptidase activity involved in apoptotic process
Biological Process	GO:0043523	regulation of neuron apoptotic process
Biological Process	GO:0043524	negative regulation of neuron apoptotic process
Biological Process	GO:0043525	positive regulation of neuron apoptotic process
Biological Process	GO:0043652	engulfment of apoptotic cell
Biological Process	GO:0043653	mitochondrial fragmentation involved in apoptotic process
Biological Process	GO:0043654	recognition of apoptotic cell
Biological Process	GO:0044336	canonical Wnt signaling pathway involved in negative regulation of apoptotic process
Biological Process	GO:0044337	canonical Wnt signaling pathway involved in positive regulation of apoptotic process
Biological Process	GO:0044346	fibroblast apoptotic process
Biological Process	GO:0051402	neuron apoptotic process
Biological Process	GO:0060058	positive regulation of apoptotic process involved in mammary gland involution
Biological Process	GO:0060139	positive regulation of apoptotic process by virus
Biological Process	GO:0060561	apoptotic process involved in morphogenesis
Biological Process	GO:0060785	regulation of apoptosis involved in tissue homeostasis
Biological Process	GO:0061296	negative regulation of mesenchymal cell apoptotic process involved in mesonephric nephron morphogenesis
Biological Process	GO:0070059	intrinsic apoptotic signaling pathway in response to endoplasmic reticulum stress
Biological Process	GO:0070227	lymphocyte apoptotic process
Biological Process	GO:0070228	regulation of lymphocyte apoptotic process
Biological Process	GO:0070229	negative regulation of lymphocyte apoptotic process
Biological Process	GO:0070230	positive regulation of lymphocyte apoptotic process
Biological Process	GO:0070231	T cell apoptotic process
Biological Process	GO:0070232	regulation of T cell apoptotic process
Biological Process	GO:0070233	negative regulation of T cell apoptotic process
Biological Process	GO:0070234	positive regulation of T cell apoptotic process
Biological Process	GO:0070242	thymocyte apoptotic process
Biological Process	GO:0070243	regulation of thymocyte apoptotic process
Biological Process	GO:0070244	negative regulation of thymocyte apoptotic process
Biological Process	GO:0070245	positive regulation of thymocyte apoptotic process
Biological Process	GO:0070247	regulation of natural killer cell apoptotic process
Biological Process	GO:0070782	phosphatidylserine exposure on apoptotic cell surface
Biological Process	GO:0071839	apoptotic process in bone marrow cell
Biological Process	GO:0071866	negative regulation of apoptotic process in bone marrow cell
Biological Process	GO:0071888	macrophage apoptotic process
Biological Process	GO:0072040	negative regulation of mesenchymal cell apoptotic process involved in nephron morphogenesis
Biological Process	GO:0072305	negative regulation of mesenchymal cell apoptotic process involved in metanephric nephron morphogenesis
Biological Process	GO:0072332	intrinsic apoptotic signaling pathway by p53 class mediator
Biological Process	GO:0072577	endothelial cell apoptotic process
Biological Process	GO:0090387	phagolysosome assembly involved in apoptotic cell clearance
Biological Process	GO:0090389	phagosome-lysosome fusion involved in apoptotic cell clearance
Biological Process	GO:0097049	motor neuron apoptotic process
Biological Process	GO:0097050	type B pancreatic cell apoptotic process
Biological Process	GO:0097152	mesenchymal cell apoptotic process
Biological Process	GO:0097190	apoptotic signaling pathway
Biological Process	GO:0097191	extrinsic apoptotic signaling pathway
Biological Process	GO:0097192	extrinsic apoptotic signaling pathway in absence of ligand
Biological Process	GO:0097193	intrinsic apoptotic signaling pathway
Biological Process	GO:0097194	execution phase of apoptosis
Biological Process	GO:0097252	oligodendrocyte apoptotic process
Biological Process	GO:0097284	hepatocyte apoptotic process
Biological Process	GO:0097296	activation of cysteine-type endopeptidase activity involved in apoptotic signaling pathway
Biological Process	GO:0097473	retinal rod cell apoptotic process
Biological Process	GO:0097474	retinal cone cell apoptotic process
Biological Process	GO:0110090	positive regulation of hippocampal neuron apoptotic process
Biological Process	GO:0110091	negative regulation of hippocampal neuron apoptotic process
Biological Process	GO:0140208	apoptotic process in response to mitochondrial fragmentation
Biological Process	GO:1900118	negative regulation of execution phase of apoptosis
Biological Process	GO:1900119	positive regulation of execution phase of apoptosis
Biological Process	GO:1900142	negative regulation of oligodendrocyte apoptotic process
Biological Process	GO:1900143	positive regulation of oligodendrocyte apoptotic process
Biological Process	GO:1900212	negative regulation of mesenchymal cell apoptotic process involved in metanephros development
Biological Process	GO:1900215	negative regulation of apoptotic process involved in metanephric collecting duct development
Biological Process	GO:1900218	negative regulation of apoptotic process involved in metanephric nephron tubule development
Biological Process	GO:1900740	positive regulation of protein insertion into mitochondrial membrane involved in apoptotic signaling pathway
Biological Process	GO:1901028	regulation of mitochondrial outer membrane permeabilization involved in apoptotic signaling pathway
Biological Process	GO:1901029	negative regulation of mitochondrial outer membrane permeabilization involved in apoptotic signaling pathway
Biological Process	GO:1901030	positive regulation of mitochondrial outer membrane permeabilization involved in apoptotic signaling pathway
Biological Process	GO:1901074	regulation of engulfment of apoptotic cell
Biological Process	GO:1901076	positive regulation of engulfment of apoptotic cell
Biological Process	GO:1902041	regulation of extrinsic apoptotic signaling pathway via death domain receptors
Biological Process	GO:1902042	negative regulation of extrinsic apoptotic signaling pathway via death domain receptors
Biological Process	GO:1902043	positive regulation of extrinsic apoptotic signaling pathway via death domain receptors
Biological Process	GO:1902108	regulation of mitochondrial membrane permeability involved in apoptotic process
Biological Process	GO:1902109	negative regulation of mitochondrial membrane permeability involved in apoptotic process
Biological Process	GO:1902110	positive regulation of mitochondrial membrane permeability involved in apoptotic process
Biological Process	GO:1902165	regulation of intrinsic apoptotic signaling pathway in response to DNA damage by p53 class mediator
Biological Process	GO:1902166	negative regulation of intrinsic apoptotic signaling pathway in response to DNA damage by p53 class mediator
Biological Process	GO:1902167	positive regulation of intrinsic apoptotic signaling pathway in response to DNA damage by p53 class mediator
Biological Process	GO:1902172	regulation of keratinocyte apoptotic process
Biological Process	GO:1902173	negative regulation of keratinocyte apoptotic process
Biological Process	GO:1902174	positive regulation of keratinocyte apoptotic process
Biological Process	GO:1902175	regulation of oxidative stress-induced intrinsic apoptotic signaling pathway
Biological Process	GO:1902176	negative regulation of oxidative stress-induced intrinsic apoptotic signaling pathway
Biological Process	GO:1902177	positive regulation of oxidative stress-induced intrinsic apoptotic signaling pathway
Biological Process	GO:1902178	fibroblast growth factor receptor apoptotic signaling pathway
Biological Process	GO:1902219	negative regulation of intrinsic apoptotic signaling pathway in response to osmotic stress
Biological Process	GO:1902220	positive regulation of intrinsic apoptotic signaling pathway in response to osmotic stress
Biological Process	GO:1902230	negative regulation of intrinsic apoptotic signaling pathway in response to DNA damage
Biological Process	GO:1902231	positive regulation of intrinsic apoptotic signaling pathway in response to DNA damage
Biological Process	GO:1902235	regulation of endoplasmic reticulum stress-induced intrinsic apoptotic signaling pathway
Biological Process	GO:1902236	negative regulation of endoplasmic reticulum stress-induced intrinsic apoptotic signaling pathway
Biological Process	GO:1902237	positive regulation of endoplasmic reticulum stress-induced intrinsic apoptotic signaling pathway
Biological Process	GO:1902239	negative regulation of intrinsic apoptotic signaling pathway in response to osmotic stress by p53 class mediator
Biological Process	GO:1902251	negative regulation of erythrocyte apoptotic process
Biological Process	GO:1902253	regulation of intrinsic apoptotic signaling pathway by p53 class mediator
Biological Process	GO:1902254	negative regulation of intrinsic apoptotic signaling pathway by p53 class mediator
Biological Process	GO:1902255	positive regulation of intrinsic apoptotic signaling pathway by p53 class mediator
Biological Process	GO:1902256	regulation of apoptotic process involved in outflow tract morphogenesis
Biological Process	GO:1902257	negative regulation of apoptotic process involved in outflow tract morphogenesis
Biological Process	GO:1902262	apoptotic process involved in blood vessel morphogenesis
Biological Process	GO:1902263	apoptotic process involved in embryonic digit morphogenesis
Biological Process	GO:1902338	negative regulation of apoptotic process involved in morphogenesis
Biological Process	GO:1902339	positive regulation of apoptotic process involved in morphogenesis
Biological Process	GO:1902362	melanocyte apoptotic process
Biological Process	GO:1902510	regulation of apoptotic DNA fragmentation
Biological Process	GO:1902511	negative regulation of apoptotic DNA fragmentation
Biological Process	GO:1902512	positive regulation of apoptotic DNA fragmentation
Biological Process	GO:1902742	apoptotic process involved in development
Biological Process	GO:1903122	negative regulation of TRAIL-activated apoptotic signaling pathway
Biological Process	GO:1903298	negative regulation of hypoxia-induced intrinsic apoptotic signaling pathway
Biological Process	GO:1903376	regulation of oxidative stress-induced neuron intrinsic apoptotic signaling pathway
Biological Process	GO:1903377	negative regulation of oxidative stress-induced neuron intrinsic apoptotic signaling pathway
Biological Process	GO:1903378	positive regulation of oxidative stress-induced neuron intrinsic apoptotic signaling pathway
Biological Process	GO:1903382	negative regulation of endoplasmic reticulum stress-induced neuron intrinsic apoptotic signaling pathway
Biological Process	GO:1903384	negative regulation of hydrogen peroxide-induced neuron intrinsic apoptotic signaling pathway
Biological Process	GO:1903751	negative regulation of intrinsic apoptotic signaling pathway in response to hydrogen peroxide
Biological Process	GO:1903944	negative regulation of hepatocyte apoptotic process
Biological Process	GO:1903984	positive regulation of TRAIL-activated apoptotic signaling pathway
Biological Process	GO:1904019	epithelial cell apoptotic process
Biological Process	GO:1904036	negative regulation of epithelial cell apoptotic process
Biological Process	GO:1904037	positive regulation of epithelial cell apoptotic process
Biological Process	GO:1904193	negative regulation of cholangiocyte apoptotic process
Biological Process	GO:1904635	positive regulation of glomerular visceral epithelial cell apoptotic process
Biological Process	GO:1904649	regulation of fat cell apoptotic process
Biological Process	GO:1904651	positive regulation of fat cell apoptotic process
Biological Process	GO:1904708	regulation of granulosa cell apoptotic process
Biological Process	GO:1904709	negative regulation of granulosa cell apoptotic process
Biological Process	GO:1904710	positive regulation of granulosa cell apoptotic process
Biological Process	GO:1905259	negative regulation of nitrosative stress-induced intrinsic apoptotic signaling pathway
Biological Process	GO:1905403	negative regulation of activated CD8-positive, alpha-beta T cell apoptotic process
Biological Process	GO:1905404	positive regulation of activated CD8-positive, alpha-beta T cell apoptotic process
Biological Process	GO:1905460	negative regulation of vascular associated smooth muscle cell apoptotic process
Biological Process	GO:1905461	positive regulation of vascular associated smooth muscle cell apoptotic process
Biological Process	GO:1905584	outer hair cell apoptotic process
Biological Process	GO:1905782	positive regulation of phosphatidylserine exposure on apoptotic cell surface
Biological Process	GO:1990001	inhibition of cysteine-type endopeptidase activity involved in apoptotic process
Biological Process	GO:1990009	retinal cell apoptotic process
Biological Process	GO:1990086	lens fiber cell apoptotic process
Biological Process	GO:1990117	B cell receptor apoptotic signaling pathway
Biological Process	GO:1990134	epithelial cell apoptotic process involved in palatal shelf morphogenesis
Biological Process	GO:1990144	intrinsic apoptotic signaling pathway in response to hypoxia
Biological Process	GO:1990442	intrinsic apoptotic signaling pathway in response to nitrosative stress
Biological Process	GO:2000107	negative regulation of leukocyte apoptotic process
Biological Process	GO:2000108	positive regulation of leukocyte apoptotic process
Biological Process	GO:2000109	regulation of macrophage apoptotic process
Biological Process	GO:2000110	negative regulation of macrophage apoptotic process
Biological Process	GO:2000111	positive regulation of macrophage apoptotic process
Biological Process	GO:2000269	regulation of fibroblast apoptotic process
Biological Process	GO:2000270	negative regulation of fibroblast apoptotic process
Biological Process	GO:2000271	positive regulation of fibroblast apoptotic process
Biological Process	GO:2000351	regulation of endothelial cell apoptotic process
Biological Process	GO:2000352	negative regulation of endothelial cell apoptotic process
Biological Process	GO:2000353	positive regulation of endothelial cell apoptotic process
Biological Process	GO:2000426	negative regulation of apoptotic cell clearance
Biological Process	GO:2000427	positive regulation of apoptotic cell clearance
Biological Process	GO:2000669	negative regulation of dendritic cell apoptotic process
Biological Process	GO:2000670	positive regulation of dendritic cell apoptotic process
Biological Process	GO:2000671	regulation of motor neuron apoptotic process
Biological Process	GO:2000672	negative regulation of motor neuron apoptotic process
Biological Process	GO:2000675	negative regulation of type B pancreatic cell apoptotic process
Biological Process	GO:2000676	positive regulation of type B pancreatic cell apoptotic process
Biological Process	GO:2001054	negative regulation of mesenchymal cell apoptotic process
Biological Process	GO:2001055	positive regulation of mesenchymal cell apoptotic process
Biological Process	GO:2001233	regulation of apoptotic signaling pathway
Biological Process	GO:2001234	negative regulation of apoptotic signaling pathway
Biological Process	GO:2001235	positive regulation of apoptotic signaling pathway
Biological Process	GO:2001236	regulation of extrinsic apoptotic signaling pathway
Biological Process	GO:2001237	negative regulation of extrinsic apoptotic signaling pathway
Biological Process	GO:2001238	positive regulation of extrinsic apoptotic signaling pathway
Biological Process	GO:2001239	regulation of extrinsic apoptotic signaling pathway in absence of ligand
Biological Process	GO:2001240	negative regulation of extrinsic apoptotic signaling pathway in absence of ligand
Biological Process	GO:2001241	positive regulation of extrinsic apoptotic signaling pathway in absence of ligand
Biological Process	GO:2001242	regulation of intrinsic apoptotic signaling pathway
Biological Process	GO:2001243	negative regulation of intrinsic apoptotic signaling pathway
Biological Process	GO:2001244	positive regulation of intrinsic apoptotic signaling pathway
Biological Process	GO:2001268	negative regulation of cysteine-type endopeptidase activity involved in apoptotic signaling pathway
Biological Process	GO:2001269	positive regulation of cysteine-type endopeptidase activity involved in apoptotic signaling pathway
Biological Process	GO:2001271	negative regulation of cysteine-type endopeptidase activity involved in execution phase of apoptosis
Biological Process	GO:2001272	positive regulation of cysteine-type endopeptidase activity involved in execution phase of apoptosis
Molecular Function	GO:0008656	cysteine-type endopeptidase activator activity involved in apoptotic process
Molecular Function	GO:0016505	peptidase activator activity involved in apoptotic process
Molecular Function	GO:0043027	cysteine-type endopeptidase inhibitor activity involved in apoptotic process
Molecular Function	GO:0043028	cysteine-type endopeptidase regulator activity involved in apoptotic process
Molecular Function	GO:0097153	cysteine-type endopeptidase activity involved in apoptotic process
Molecular Function	GO:0097199	cysteine-type endopeptidase activity involved in apoptotic signaling pathway
Molecular Function	GO:0097200	cysteine-type endopeptidase activity involved in execution phase of apoptosis
